# Supplementary material for: Underage Youth and Young Adult e-Cigarette Use and Access Before and During the Coronavirus Disease 2019 Pandemic
Source: PubMed Central journal article supplement (PMC7716191; doi:10.1001/jamanetworkopen.2020.27572), 2020-12-03
Supplement: jamanetwopen-e2027572-s001.pdf [file jamanetwopen-e2027572-s001.pdf]

## Supplementary Online Content

Gaiha SM, Lempert LK, Halpern-Felsher B. Underage youth and young adult e-cigarette use and access before and during the coronavirus disease 2019 pandemic. *JAMA Netw Open*. 2020;3(12):e2027572. doi:10.1001/jamanetworkopen.2020.27572

**eTable 1.** Measures on Sociodemographic Information

**eTable 2.** Nicotine Strength Used Before and After COVID-19

**eTable 3.** Time Taken to Finish an e-Cigarette or Pod Before and After COVID-19

**eTable 4.** Percentage of Participants Above and Below the Legal Age Purchasing e-Cigarettes From Locations Before and After COVID-19

This supplementary material has been provided by the authors to give readers additional information about their work.

**eTable 1. Measures on sociodemographic information**

| Measure                                     | Survey question                                                                                                                                                                                                                                                                                                                | Response type and code                                                                                                                                                                                                                                                                                                |
|---------------------------------------------|--------------------------------------------------------------------------------------------------------------------------------------------------------------------------------------------------------------------------------------------------------------------------------------------------------------------------------|-----------------------------------------------------------------------------------------------------------------------------------------------------------------------------------------------------------------------------------------------------------------------------------------------------------------------|
| Socio-demographic information               |                                                                                                                                                                                                                                                                                                                                |                                                                                                                                                                                                                                                                                                                       |
| Age                                         | How old are you today?                                                                                                                                                                                                                                                                                                         | Numeric (age between 13-24 years). Responses 13-17 categorized as “Adolescents;” 18-21 as “Young adults” and 22-24 as “Adults.”                                                                                                                                                                                       |
| Sex                                         | Do you identify as... 1) Female; 2) Male, 3) Non-Binary/ Other; 4) Choose to not specify/indicate.                                                                                                                                                                                                                             | Categorical. Females were coded “1,” males as “2” and all others as “3.”                                                                                                                                                                                                                                              |
| LGBTQ                                       | Do you consider yourself to be: 1) Heterosexual or straight; 2) LGBTQ+ , 3) Other, please specify_____                                                                                                                                                                                                                         | Categorical. Response yes to 2) LGBTQ+ were coded “1” and all others as “0.”                                                                                                                                                                                                                                          |
| Race/ethnicity                              | A. What is your ethnicity?<br>1) Hispanic or Latino; 2) Not Hispanic or Latino<br>B. What is your race? Choose one or more if applicable. 1) American Indian or Alaska Native; 2) Asian; 3) Black or African American ; 4) Native Hawaiian or Other Pacific Islander; 5) White; 6) More than one race; 7) Prefer not to answer | Categorical. Responses to A and B were coded as “0” for White, non-Hispanic; “1” for AA/Black, non-Hispanic; “2” for Asian/ Native Hawaiian or Pacific Islander, non-Hispanic; “3” Hispanic, non-AA/black and “4” for Other/multiracial, non-Hispanic. Prefer not to answer were included with 4, Other/ multiracial. |
| State and region                            | In what state or U.S. territory do you live?                                                                                                                                                                                                                                                                                   | Categorical; Responses were coded in to 5 regions based on US Census data.                                                                                                                                                                                                                                            |
| Complying with Stay-at-home mandate         | Are you completely complying with shelter-in-place or stay at home orders?<br>1) Yes, 2) No, 3) Don't know                                                                                                                                                                                                                     | Dichotomous (Yes/ No). Yes was coded “1” and No was coded “0.” No participants answered 3).                                                                                                                                                                                                                           |
| Friends complying with stay-at-home mandate | Are your friends completely complying with shelter-in-place or stay at home orders?<br>1) Yes, 2) No, 3) Don't know                                                                                                                                                                                                            | Dichotomous (Yes/ No). Yes was coded “1” and No was coded “0.” No participants answered 3).                                                                                                                                                                                                                           |

**eTable 2. Nicotine strength used before and after COVID-19, no. (%)**

| Nicotine strength before COVID-19        | Nicotine strength after COVID-19 |                                      |                               |             |              |
|------------------------------------------|----------------------------------|--------------------------------------|-------------------------------|-------------|--------------|
|                                          | Less than 2.5% (less than 25mg)  | Between 2.5% and 5% (about 25-50 mg) | More than 5% (more than 50mg) | Don't know  | Total        |
| <b>Disposable pod-based e-cigarettes</b> |                                  |                                      |                               |             |              |
| Less than 2.5% (less than 25mg)          | 137 (43.8)                       | 35 (10.3)                            | 16 (8.0)                      | 30 (12.4)   | 218 (19.9)   |
| Between 2.5% and 5% (about 25-50 mg)     | 127 (40.6)                       | 266 (78.2)                           | 58 (29.0)                     | 42 (17.4)   | 493 (45.1)   |
| More than 5% (more than 50mg)            | 38 (12.1)                        | 35 (10.3)                            | 121 (60.5)                    | 20 (8.3)    | 214 (19.5)   |
| Don't know                               | 11 (3.5)                         | 4 (1.2)                              | 5 (2.5)                       | 150 (61.9)  | 170 (15.5)   |
| Total                                    | 313 (100.0)                      | 340 (100.0)                          | 200 (100.0)                   | 242 (100.0) | 1095 (100.0) |
| <b>Pod-based e-cigarettes</b>            |                                  |                                      |                               |             |              |
| Less than 2.5% (less than 25mg)          | 96 (54.8)                        | 15 (9.9)                             | 5 (5.9)                       | 29 (14.3)   | 145 (23.6)   |
| Between 2.5% and 5% (about 25-50 mg)     | 50 (28.6)                        | 111 (73.5)                           | 22 (25.9)                     | 19 (9.4)    | 202 (32.9)   |
| More than 5% (more than 50mg)            | 22 (12.6)                        | 23 (15.2)                            | 55 (64.7)                     | 12 (5.9)    | 112 (18.2)   |
| Don't know                               | 7 (4.0)                          | 2 (1.3)                              | 3 (3.5)                       | 143 (70.4)  | 155 (25.2)   |
| Total                                    | 175 (100.0)                      | 151 (100.0)                          | 85 (100.0)                    | 203 (100.0) | 614 (100.0)  |
| <b>Other e-cigarettes</b>                |                                  |                                      |                               |             |              |
| Less than 2.5% (less than 25mg)          | 74 (66.1)                        | 16 (15.8)                            | 10 (13.3)                     | 16 (13.2)   | 116 (28.4)   |
| Between 2.5% and 5% (about 25-50 mg)     | 23 (20.5)                        | 71 (70.3)                            | 19 (25.3)                     | 14 (11.6)   | 127 (31.0)   |
| More than 5% (more than 50mg)            | 11 (9.8)                         | 13 (12.9)                            | 43 (57.3)                     | 9 (7.4)     | 76 (18.6)    |
| Don't know                               | 4 (3.6)                          | 1 (1.0)                              | 3 (4.0)                       | 82 (67.8)   | 90 (22.9)    |
| Total                                    | 112 (100.0)                      | 101 (100.0)                          | 75 (100.0)                    | 121 (100.0) | 409 (100.0)  |

**eTable 3. Time taken to finish an e-cigarette or pod before and after COVID-19, no. (%)**

| Time taken to finish before COVID-19     | Time taken to finish after COVID-19 |             |             |             |             |             |             | Total        |
|------------------------------------------|-------------------------------------|-------------|-------------|-------------|-------------|-------------|-------------|--------------|
|                                          | <1 day                              | 1-2 days    | 3-5 days    | 1 week      | 2 weeks     | 1 month     | Don't know  |              |
| <b>Disposable pod-based e-cigarettes</b> |                                     |             |             |             |             |             |             |              |
| <b>&lt;1 day</b>                         | 46 (42.6)                           | 16 (8.2)    | 7 (3.4)     | 2 (1.3)     | 4 (4.1)     | 5 (4.8)     | 9 (2.8)     | 89 (7.5)     |
| <b>1-2 days</b>                          | 39 (36.1)                           | 76 (39.2)   | 33 (16.0)   | 15 (10.1)   | 6 (6.1)     | 3 (2.8)     | 17 (5.2)    | 189 (15.9)   |
| <b>3-5 days</b>                          | 14 (12.9)                           | 83 (42.8)   | 107 (51.9)  | 37 (24.8)   | 16 (16.3)   | 13 (12.4)   | 29 (8.9)    | 299 (25.2)   |
| <b>1 week</b>                            | 6 (5.6)                             | 13 (6.7)    | 42 (20.4)   | 56 (37.6)   | 27 (27.5)   | 12 (11.4)   | 27 (8.3)    | 183 (15.4)   |
| <b>2 weeks</b>                           | 2 (1.8)                             | 3 (1.5)     | 12 (5.8)    | 33 (22.1)   | 30 (30.6)   | 13 (12.4)   | 36 (11.0)   | 129 (10.9)   |
| <b>1 month</b>                           | 1 (0.9)                             | 0 (0.0)     | 3 (1.5)     | 3 (2.0)     | 14 (14.3)   | 56 (53.3)   | 32 (9.8)    | 109 (9.2)    |
| <b>Don't know</b>                        | 0 (0.0)                             | 3 (1.5)     | 2 (0.9)     | 3 (2.0)     | 1 (1.0)     | 3 (2.9)     | 176 (53.9)  | 188 (15.8)   |
| <b>Total</b>                             | 108 (100.0)                         | 194 (100.0) | 206 (100.0) | 149 (100.0) | 98 (100.0)  | 105 (100.0) | 326 (100.0) | 1186 (100.0) |
| <b>Pod-based e-cigarettes</b>            |                                     |             |             |             |             |             |             |              |
| <b>&lt;1 day</b>                         | 56 (43.4)                           | 11 (6.2)    | 9 (3.9)     | 1 (0.6)     | 1 (0.9)     | 2 (1.2)     | 14 (2.4)    | 94 (6.1)     |
| <b>1-2 days</b>                          | 46 (35.7)                           | 86 (48.6)   | 38 (16.5)   | 17 (10.3)   | 6 (5.9)     | 5 (3.1)     | 27 (4.7)    | 225 (14.6)   |
| <b>3-5 days</b>                          | 21 (16.3)                           | 66 (37.3)   | 111 (48.3)  | 35 (21.2)   | 13 (12.9)   | 14 (8.6)    | 34 (5.9)    | 294 (19.1)   |
| <b>1 week</b>                            | 2 (1.5)                             | 9 (5.1)     | 51 (22.2)   | 77 (46.7)   | 19 (18.8)   | 16 (9.8)    | 41 (7.2)    | 215 (13.9)   |
| <b>2 weeks</b>                           | 1 (0.8)                             | 4 (2.3)     | 15 (6.5)    | 31 (18.8)   | 51 (50.5)   | 31 (19.0)   | 32 (5.6)    | 165 (10.7)   |
| <b>1 month</b>                           | 2 (1.5)                             | 1 (0.5)     | 3 (1.3)     | 3 (1.8)     | 11 (10.9)   | 90 (55.2)   | 48 (8.4)    | 158 (10.3)   |
| <b>Don't know</b>                        | 1 (0.8)                             | 0 (0.0)     | 3 (1.3)     | 1 (0.6)     | 0 (0.0)     | 5 (3.1)     | 377 (65.8)  | 387 (25.2)   |
| <b>Total</b>                             | 129 (100.0)                         | 177 (100.0) | 230 (100.0) | 165 (100.0) | 101 (100.0) | 163 (100.0) | 573 (100.0) | 1538 (100.0) |
| <b>Other e-cigarettes</b>                |                                     |             |             |             |             |             |             |              |
| <b>&lt;1 day</b>                         | 42 (45.2)                           | 9 (7.5)     | 6 (3.5)     | 6 (4.6)     | 0 (0.0)     | 2 (1.7)     | 3 (0.8)     | 68 (6.2)     |
| <b>1-2 days</b>                          | 31 (33.3)                           | 56 (46.7)   | 33 (19.4)   | 12 (9.2)    | 3 (3.6)     | 4 (3.4)     | 7 (1.8)     | 146 (13.3)   |
| <b>3-5 days</b>                          | 13 (13.9)                           | 38 (31.7)   | 80 (47.1)   | 20 (15.4)   | 7 (8.4)     | 4 (3.4)     | 22 (5.7)    | 184 (16.7)   |
| <b>1 week</b>                            | 3 (3.2)                             | 10 (8.3)    | 37 (21.8)   | 62 (47.7)   | 16 (19.3)   | 11 (9.4)    | 15 (3.9)    | 154 (14.0)   |
| <b>2 weeks</b>                           | 0 (0.0)                             | 3 (2.5)     | 13 (7.6)    | 27 (20.8)   | 37 (44.6)   | 12 (10.3)   | 20 (5.2)    | 112 (12.6)   |
| <b>1 month</b>                           | 1 (1.1)                             | 3 (2.5)     | 0 (0.0)     | 2 (1.5)     | 18 (21.7)   | 80 (68.4)   | 35 (9.0)    | 139 (12.6)   |
| <b>Don't know</b>                        | 3 (3.2)                             | 1 (0.8)     | 1 (0.6)     | 1 (0.8)     | 2 (2.4)     | 4 (3.4)     | 285 (73.6)  | 297 (27.0)   |
| <b>Total</b>                             | 93 (100.0)                          | 120 (100.0) | 170 (100.0) | 130 (100.0) | 83 (100.0)  | 117 (100.0) | 387 (100.0) | 1110 (100.0) |

**eTable 4. Percentage of participants above and below the legal age purchasing e-cigarettes from locations before and after COVID-19**

| Location                                    | Disposables      |                 |                  |                 |                  |                 | Pod-based e-cigarettes |                 |                  |                 |                  |                 | Other e-cigarettes |                 |                  |                 |                  |                 |
|---------------------------------------------|------------------|-----------------|------------------|-----------------|------------------|-----------------|------------------------|-----------------|------------------|-----------------|------------------|-----------------|--------------------|-----------------|------------------|-----------------|------------------|-----------------|
|                                             | Total sample     |                 | Under <21        |                 | Above 21         |                 | Total sample           |                 | Underage (<21)   |                 | Above 21         |                 | Total sample       |                 | Underage (<21)   |                 | Above 21         |                 |
|                                             | Before COVID (%) | After COVID (%) | Before COVID (%) | After COVID (%) | Before COVID (%) | After COVID (%) | Before COVID (%)       | After COVID (%) | Before COVID (%) | After COVID (%) | Before COVID (%) | After COVID (%) | Before COVID (%)   | After COVID (%) | Before COVID (%) | After COVID (%) | Before COVID (%) | After COVID (%) |
| <b>N</b>                                    | <b>706</b>       | <b>632</b>      | <b>393</b>       | <b>350</b>      | <b>313</b>       | <b>282</b>      | <b>900</b>             | <b>799</b>      | <b>508</b>       | <b>449</b>      | <b>392</b>       | <b>350</b>      | <b>629</b>         | <b>560</b>      | <b>348</b>       | <b>308</b>      | <b>281</b>       | <b>252</b>      |
| Smoke shop or vape shop                     | 26.8             | 17.9            | 26.5             | 18.3            | 27.2             | 17.4            | 27.0                   | 18.0            | 27.4             | 18.7            | 26.5             | 17.1            | 32.4               | 23.4            | 37.1             | 27.3            | 26.7             | 18.6            |
| Gas station                                 | 24.4             | 22.8            | 27.7             | 25.7            | 20.1             | 19.1            | 23.9                   | 20.6            | 27.2             | 23.6            | 19.6             | 16.9            | 18.6               | 17.9            | 21.5             | 19.5            | 14.9             | 15.9            |
| Online                                      | 16.1             | 33.1            | 13.7             | 30.3            | 19.2             | 36.5            | 18.6                   | 36.5            | 17.5             | 35.4            | 19.9             | 38.0            | 17.8               | 35.5            | 15.8             | 33.1            | 20.3             | 38.5            |
| Convenience store (like 7/11 or local mart) | 11.2             | 9.5             | 11.5             | 11.4            | 10.9             | 7.1             | 11.6                   | 8.3             | 11.4             | 9.3             | 11.7             | 6.9             | 9.7                | 7.7             | 8.6              | 8.1             | 11.0             | 7.1             |
| Drugstore (like Rite Aid)                   | 7.8              | 5.4             | 7.4              | 3.1             | 8.3              | 8.2             | 8.0                    | 6.0             | 7.5              | 4.0             | 8.7              | 8.6             | 6.7                | 4.8             | 5.2              | 2.6             | 8.5              | 7.5             |
| Liquor store                                | 7.2              | 6.2             | 6.4              | 6.6             | 8.3              | 5.7             | 5.4                    | 5.6             | 3.9              | 4.9             | 7.4              | 6.6             | 6.0                | 4.1             | 5.7              | 3.6             | 6.4              | 4.8             |
| Medical marijuana dispensary                | 2.7              | 2.1             | 3.3              | 2.0             | 1.9              | 2.1             | 2.4                    | 2.5             | 1.8              | 1.8             | 3.3              | 3.4             | 3.8                | 2.3             | 2.0              | 2.3             | 6.0              | 2.4             |
| Supermarket (like Safeway)                  | 2.3              | 1.4             | 2.5              | 1.1             | 1.9              | 1.7             | 0.9                    | 1.2             | 0.8              | 1.1             | 1.0              | 1.4             | 2.2                | 2.1             | 2.6              | 2.6             | 1.8              | 1.6             |
| Big retail store (like Walmart)             | 1.6              | 1.7             | 1.0              | 1.4             | 2.2              | 2.1             | 2.2                    | 1.1             | 2.6              | 1.1             | 1.8              | 1.1             | 2.7                | 2.1             | 1.4              | 1.0             | 4.3              | 3.6             |
